1 **Seawater salt-trapped *Pseudomonas aeruginosa* survives for years and gets**  
2 **primed for salinity tolerance**

3 Hamouda Elabed<sup>1,2</sup>, Enrique González-Tortuero<sup>3,4</sup>, Claudia Ibacache-Quiroga<sup>2,7</sup>, Amina  
4 Bakhrouf<sup>6</sup>, Paul Johnston<sup>4,5</sup>, Kamel Gaddour<sup>6</sup>, Jesús Blázquez<sup>2</sup>, Alexandro Rodríguez-  
5 Rojas<sup>5\*</sup>.

6

7 <sup>1</sup>Laboratory of Contagious Diseases and Biologically Active Substances LR99-ES27  
8 Faculty of Pharmacy of Monastir, University of Monastir, Tunisia

9

10 <sup>2</sup>Department of Microbial Biotechnology, Spanish National Center for Biotechnology  
11 (CNB), Madrid, Spain.

12

13 <sup>3</sup>Department of Ecosystem Research, Leibniz-Institute of Freshwater Ecology and  
14 Inland Fisheries (IGB), Berlin, Germany.

15

16 <sup>4</sup>Berlin Centre for Genomics in BiodiversityResearch (BeGenDiv), Berlin, Germany.

17

18 <sup>5</sup>Institute of Biology, FreieUniversität Berlin, Berlin, Germany.

19

20 <sup>6</sup>Laboratory of Analysis, Treatment and Valorization of Environmental Polluants and  
21 products, Faculty of Pharmacy, University of Monastir, Tunisia.

22

23

24 <sup>7</sup>Centro de Micro-Bioinnovación, Escuela de Nutrición y Dietética, Facultad de  
25 Farmacia, Universidad de Valparaíso, Valparaíso, Chile.

26

27 \* Corresponding author: [a.rojas@fu-berlin.de](mailto:a.rojas@fu-berlin.de)

28

29

30

31

32

### 33 **Abstract**

34 **Background:** In nature, microorganisms have to adapt to long-term stressful conditions  
35 often with growth limitations. However, little is known about the evolution of the  
36 adaptability of new bacteria to such environments. *Pseudomonas aeruginosa*, an  
37 opportunistic pathogen, after natural evaporation of seawater, was shown to be trapped  
38 in laboratory-grown halite crystals and to remain viable after entrapment for years.  
39 However, how this bacterium persists and survives in such hypersaline conditions is not  
40 understood.

41 **Results:** In this study, we aimed to understand the basis of survival, and to characterise  
42 the physiological changes required to develop salt tolerance using *P. aeruginosa* as a  
43 model. Several clones of  
44 *P. aeruginosa* were rescued after fourteen years in naturally evaporated marine salt  
45 crystals. Incubation of samples in nutrient-rich broth allowed re-growth and subsequent  
46 plating yielded observable colonies. Whole genome sequencing of the *P. aeruginosa*  
47 isolates confirmed the recovery of the original strain. The re-grown strains, however,  
48 showed a new phenotype consisting of an enhanced growth in growing salt  
49 concentration compared to the ancestor strain. The intracellular accumulation of K<sup>+</sup> was  
50 elicited by high concentration of Na<sup>+</sup> in the external medium to maintain the  
51 homeostasis. Whole transcriptomic analysis by microarray indicated that seventy-eight  
52 genes had differential expression between the parental strain and derivative clones.  
53 Sixty-one transcripts were up-regulated, while seventeen were down-regulated. Based  
54 on a collection of single-gene knockout mutants and gene ontology analysis, we  
55 suggest that the adaptive response in *P. aeruginosa* to hyper-salinity relies on multiple

56 gene product interactions.

57 **Conclusions:** The individual gene contributions build up the observed phenotype, but  
58 do not ease the identification of salinity-related metabolic pathways. The long-term  
59 inclusion of *P. aeruginosa* in salt crystals primes the bacteria, mediating a readjustment  
60 of the bacterial physiology to growth in higher salt concentrations. Our findings provide  
61 a starting point to understand how *P. aeruginosa*, a relevant environmental and  
62 pathogenic bacterium, survives to long-term salt stress.

63 **Keywords:** *Pseudomonas aeruginosa*; gene expression; salt priming; long-term stress.

64

65

## 66 **Background**

67 In their natural environments, microbes often have to cope with stressful conditions. The  
68 limitation of nutrients, intense competition for resources and a variety of abiotic stresses  
69 such as radiation, temperature, pH, oxygen-derived radicals, antibiotics and high  
70 osmolarity are commonly experienced by bacteria [1].

71 Reports on the extreme longevity of microbes in salt are controversial [2]. Hypersaline  
72 environments have been a significant reservoir for the long-term evolution of specially  
73 adapted microorganisms [3]. Additionally, saline environments may aid the survival of  
74 microorganisms, protecting them from desiccation by trapping the cells in fluid  
75 inclusions, a phenomenon that occurs in salt crystals upon evaporation [4]. Several  
76 studies on ancient microbes are consistent with laboratory experiments and studies on  
77 other modern surface halite deposits, which suggest that microorganisms persist inside  
78 fluid inclusions in halite for many year [5–7].

79 In a previous study, *Pseudomonas aeruginosa* cells were shown to get trapped in fluid

80 inclusions pockets of saturated brine in laboratory-grown halite crystals and to remain  
81 viable after entrapment [5]. The ability of *P. aeruginosa* to colonise and thrive in myriad  
82 environments correlates with its relatively large genome and genetic complexity [8]. An  
83 exceedingly high number of assigned open reading frames are transcriptional regulators  
84 or members of two-component regulatory systems in comparison to other bacteria [9].  
85 This large proportion of regulatory genes also facilitates *P. aeruginosa* adaptability and  
86 sensing diverse environmental stresses [8–11]. Potassium is the major intracellular  
87 cation in bacteria and plays an important role to maintain homeostasis. In osmotic  
88 conditions, bacterial cells accumulate K<sup>+</sup> by a number of different transport systems that  
89 vary in kinetics, energy coupling, and regulation [12].  
90 However, despite advances in the understanding of the immediate response to  
91 hyperosmotic shock in *P. aeruginosa* [13], the physiological mechanisms that allow the  
92 bacterial persistence in highly saline environments are still poorly understood. Molecular  
93 basis of this persistence may be of great interest to both clinical and environmental  
94 microbiology. In the present study, we assess the phenotypic and genotypic changes of  
95 *P. aeruginosa* ATCC 27853 after fourteen years of entrapment in seawater salt crystals  
96 to characterise the required physiological changes that allow salt tolerance.

97

98

99

100

101

102

103

## 104 **Results**

### 105 **Evaluation of fitness in different salt conditions**

106 In this work, we study the effects of long-term incubation in extremely salty conditions  
107 on *P. aeruginosa* using microarrays and salt-tolerance assays. After fourteen years of  
108 inclusion in evaporated seawater  
109 (37 g/l of salts), different clones of *P. aeruginosa* were recovered and cultivated. The  
110 revitalisation of the culture in nutrient broth at 37°C rendered bacterial suspensions that  
111 reached an average of  
112  $OD_{600nm}$ :  $0.9 \pm 0.06$ , after 48 hours of incubation. The ancestor strain (T0 or control) and  
113 its derivative 48-hour clones (T48), did not show significant differences in growth rate  
114 when cultured with NaCl 8.5 mM (normal concentration of NaCl in DM medium (Table  
115 1). However, the final OD was significantly higher in the recovered T48 strain. This  
116 implies a growth advantage in the stationary phase demonstrating the adaptability of the  
117 recovered cells to extremes conditions such as starvation. After the long period in salt  
118 crystals, supposing the selection of more adapted mutants, we also cultured the  
119 bacteria on increasing concentrations of NaCl. The variants T48 showed an improved  
120 growth rate at concentrations of 250 or 500 mM (Table 1). At 1M, the ancestor strain  
121 was not able to grow, whereas T48 clones reached the highest optical density of all  
122 conditions (Figure 1). These first results suggested that derivative T48 clones acquired  
123 the ability to thrive in high-salt environments, even at NaCl concentrations that were  
124 restrictive for the original strain. However, no significant differences were found when  
125 comparing growth rates ( $r$ ) between T0 and T48 variants at other evaluated NaCl

126 concentration (Table 1). Moreover, the addition of 100 mM KCl to bacterial cultures of  
127 the T0 strain, inhibited by 1M of NaCl, restored the growth of this strain and allowed T48  
128 strain to growth even at 2M NaCl (Figure 2), indicating that growth inhibition not only  
129 depends on salt concentration but also on the composition of growth media. The  
130 tolerance to NaCl is then influenced by the level of KCl or maybe the ability of the cell to  
131 control K<sup>+</sup> transport. Hence, our expectations were to find the role of K<sup>+</sup> and Na<sup>+</sup>  
132 transporters or regulators in *P. aeruginosa* to long-term hypertonic conditions. All these  
133 observations demonstrate that after incubation of *P. aeruginosa* in seawater crystals for  
134 a long period (14 years), the cells adapted and became more tolerant to higher salt  
135 concentrations.

136

### 137 **Whole genome sequencing after recovery from salt**

138 To characterise possible genomic adaptations to salt in *P. aeruginosa*, we sequenced  
139 five independent clones and the reference strain using a whole genome sequencing  
140 approach based on the Illumina MiSeq platform. Seven non-synonymous substitutions  
141 were found in the sequenced clones. These mutations were present in one aromatic  
142 amino acid transporter, prepilin-type N-terminal cleavage/methylation domain-containing  
143 protein, FHA domain-containing protein, hybrid sensor histidine kinase/response  
144 regulator and two hypothetical proteins. In addition, three SNPs resulting in a  
145 synonymous substitution (c.795G>C p.Arg265Arg; c.34T>C p.Leu12Leu and c.54C>T  
146 p.Ser18Ser) respectively in DNA polymerase III subunit beta and in two hypothetical  
147 proteins were also detected by WGS (Table S1). Three other mutations were identified  
148 in intergenic sites. The products of the genes with non-synonymous mutations do not

149 seem to contribute in salt stress response. Overall, the lack of convergence in the  
150 mutations makes difficult to assign any effect to these SNPs. Suggesting that the  
151 changes on salt resistance in the studied strain were probably associated with adaptive  
152 response based on changes in global gene expression.

153

#### 154 **Transcriptome profiling of salt-trapped *P. aeruginosa***

155 As the phenotype of T48 clones cannot be easily explained by mutations, differences  
156 between T0 and T48 may be due to physiological changes that remain after the  
157 recovery from the seawater salt crystals. To investigate the differential gene expression  
158 between the wild-type T0 and its salt-tolerant derivate T48, transcriptome analysis by  
159 microarrays rendered 78 genes with significant changes in their expression level. From  
160 these 78 genes, 25 are genes related to cellular metabolism, 18 are associated to  
161 virulence factors, 14 are hypothetical proteins, 11 are associated to transporters and  
162 regulatory peptides, 4 are membrane proteins, 4 are implicated in post translational  
163 modification and 2 are chaperones and heat shock proteins (Table 2). A global view of  
164 all differentially expressed genes is presented in the MA plot in the Figure S1.

165 From the 25 genes encoding enzymes or proteins implicated in the cellular metabolism  
166 which are differentially expressed between T0 and T48, 20 genes are up-regulated and  
167 five are down-regulated. When the 18 genes associated with expression of virulence  
168 factors are analysed, all Type III Secretion System (T3SS) proteins and two cytotoxin  
169 secretion factor exoenzymes, ExoS (PA3841) and ExoT (PA0044) are up-regulated  
170 (Table 2). A remarkable increase of the expression of H<sup>+</sup> transport T3SS ATPase (*pscN*  
171 – PA1697) was also observed in T48 strains. Interestingly, its product can be

172 responsible for Na<sup>+</sup> extrusion in *P. aeruginosa*. A substantial homeostatic capacity is  
173 necessary for adaptation and tolerance to a change in the external environment.

174 There are eight genes encoding transporters that were up-regulated in T48. Except for  
175 the genes related to the symport of Na<sup>+</sup>/Alanine/Glycine (PA2252), transport of sulphate  
176 (*cysW*– PA0281 and *cysT*– PA0282), and the C5-dicarboxylate transport (PA5530), all  
177 transporters are putative components of ABC transporters (PA2204, PA3019), and  
178 putative amino acid permeases (PA3641, PA0789). Additionally, three genes (a  
179 probable AGCS Na<sup>+</sup>/alanine/glycine symporter – PA2252, a probable amino acid  
180 permease – PA3641, and *nqrB* – PA2998) involved in Na<sup>+</sup> ions transport (GO:0006814)  
181 were induced in the T48 variants (fold change 3.10, 2.42 and 2.11 respectively; Table  
182 S1 and S2).

183 There is also a set of genes (14 in total) coding for unknown functions that are  
184 differentially regulated, half of them are up-regulated and the rest down-regulated  
185 (Table 2). Interestingly, when these results are linked to the genome sequence analysis,  
186 none of the differentially regulated hypothetical proteins had mutations in the ORF or  
187 the promoter. One of these up-regulated hypothetical proteins is *yjiT* (PA4627), which  
188 product could be a putative rRNA (Guanin-N2)-methyltransferase (GO:0008990)  
189 according to the Gene Ontology analysis.

190

### 191 **Gene Ontology Analysis**

192 A global analysis of the differentially regulated genes by Gene Ontology (GO) was  
193 performed. Such analysis revealed that the majority of the proteins are grouped  
194 according to the “catalytic activity” and “binding” biological functions (Figure 4A, Table



195 S3). When analysed the cellular component category of the GOs, “cell part” which  
196 comprises the “plasma membrane” and “intracellular” categories and “macromolecular  
197 complex” represent the two groups (Figure 4B). Additionally, the regulated genes could  
198 be involved in two biological processes: “metabolic process” and “cellular process”  
199 (Figure 4C). When analysed, the product genes’ functions, “transferases”,  
200 “oxidoreductases”, “hydrolases”, and “lyases” are the most abundant protein functions  
201 (Figure 4D). Stressed bacteria followed a complex adaptive response that involves  
202 different biological processes such as the regulation of oxidation-reduction process,  
203 regulation of cell shape, transmembrane transport systems and cell redox homeostasis.  
204

#### 205 **Salt tolerance assay of *P. aeruginosa* mutants**

206 The detection of a large number of genes differentially regulated in the T48 variant  
207 (Table 2) confirmed the hypothesis that high salt resistance in T48 is linked to many  
208 genes that participate together in the adaptive response of *P. aeruginosa*. However, it is  
209 difficult to determine the individual contribution of each gene in the adaptation to  
210 hypersalinity. For this reason, to investigate the individual contribution of each one of  
211 the differentially regulated genes in the T48 variant, we decided to explore their  
212 available mutants in the  
213 *P. aeruginosa* PA14 transposon insertion library [21]. From 78 differentially regulated  
214 genes, mutants for 39 genes could be recovered from the library (Table S2). These  
215 individual knock-out mutants were tested for growth at different NaCl concentrations.  
216 Our results indicated that only mutants in *ccoO2* (cytochrome c oxidase subunit),  
217 PA4517 (conserved hypothetical protein), *dnaK* (chaperone), and *hslU* (ATP-dependent

218 protease) showed a significant difference with the wild type when grown in 8.5 and 500  
219 mM NaCl (Figure3). Some mutants (in PA1556, PA4517 and PA4761) grew worse than  
220 the parental strain in low salt concentration (8.5 mM NaCl), while all they did grow better  
221 in high salinity medium (500 mM).

222

## 223 **Discussion**

224 The results of this study show that *P. aeruginosa* can survive and adapt to prolonged  
225 extreme stress conditions. The obtained data suggest that the differential response to  
226 salt stress between T0 and T48 variants is not linked to specific mutational events. This  
227 in line with previous finding with these clones recovered from salt, where has been  
228 shown that after several passages, bacteria recover their normal phenotype [14].  
229 However, we cannot discard that some of the detected mutations could play a role in  
230 the observed phenotypes. Genetic manipulation of *P. aeruginosa* at single nucleotide  
231 level is nowadays still a challenge.

232 The gene expression analysis revealed that many genes are differentially regulated in  
233 the stressed cells. The differential induction of membrane transporters may reflect  
234 altered ion fluxes between the bacterial cell and the surrounding medium to maintain  
235 homoeostasis. In fact, the primary response of bacteria to a highly osmotic environment  
236 is the accumulation of certain solutes, like K<sup>+</sup>, glutamate, trehalose, proline, and glycine  
237 betaine, at concentrations that are proportional to the osmolarity of the medium [15].

238 When bacteria face a growing concentration of Na<sup>+</sup>, they actively transport K<sup>+</sup> ions [15].  
239 A recent study demonstrated that a steady K<sup>+</sup> supply, even under unfavourable  
240 energetic conditions, plays a key role in long-term survival and desiccation tolerance for

241 *Halobacterium salinarum* within salt crystal [16]. This is consistent with the fact that Na<sup>+</sup>/  
242 K<sup>+</sup> transporters were slightly induced in the T48 variant, including, the glutathione-  
243 regulated K<sup>+</sup>-efflux system protein KefB (PA1207; 1.5-fold regulation) and a putative K<sup>+</sup>  
244 channel (PA1496; 1.52-fold regulation). K<sup>+</sup> transporters are regulated by an increase in  
245 environment osmolarity regardless of the solute used and turgor. This response is  
246 modulated by the external concentrations of Na<sup>+</sup>. The K<sup>+</sup> ions act as a cytoplasmic-  
247 signaling molecule, activating and/or inducing enzymes and transport systems that  
248 allow the cell to adapt to elevated salinity [12, 15].

249 Additionally, three genes involved in Na<sup>+</sup> ion transport (GO:0006814) were induced in  
250 the T48 variants (PA2252, PA3641 *nqrB* – PA2998; fold change 3.10, 2.42 and 2.11  
251 respectively; Tables S1 and S2). The product of *nqrB* gene is a unique energy-  
252 transducing complex, widely distributed among marine and pathogenic bacteria. It  
253 converts the energy from the oxidation of NADH and the reduction of quinone into an  
254 electrochemical Na<sup>+</sup>-gradient that can provide energy to the cell [17]. In addition, it  
255 allows the Na<sup>+</sup> ion to pass through the hydrophobic core of the membrane and provides  
256 cation specificity to the translocation system [18]. These results are complementary with  
257 the 6 up-regulated and 13 down-regulated transporters (Table 2). From these 6 up-  
258 regulated transporters, *mfc* (PA3491) is related with the electron transport complex,  
259 which is overexpressed when *IscR* is up-regulated [19]. In contrast, *mfe* (PA3494), the  
260 putative periplasmic component of the RNF system [20], is underexpressed in T48  
261 variants, a contradiction as the RNF system is very close to the Na<sup>+</sup>-pumping  
262 NADH:ubiquinone oxidoreductase [20, 21]. Another important up-regulated transporter  
263 is *czcB* (PA2521), which is associated with resistance to heavy metals [22–24], but

264 recently it was discovered that it is also responsible for Ca<sup>2+</sup> ions homeostasis [25].  
265 Other up-regulated transporters are *nark1* (PA3877; related with the nitrate respiration  
266 under anaerobic conditions [25, 26]), *ompI* (PA3894; related to the aminoglycoside  
267 resistance [27]), and two more probable transporters with unknown associated  
268 metabolites (PA1876, *yhiH* – PA5231). Despite the fact that the gene coding for OmpI is  
269 up-regulated in T48 (Table 2), MexCD (PA4598 and PA4599) transporters, which are  
270 related to fluoroquinolones resistance [81, 82], are down-regulated. Similarly, LptG  
271 (PA3827), a lipopolysaccharide export system permease, is also down-regulated.  
272 Regarding transporters related to carbohydrate transport, RbsA (PA1947) and YhhS  
273 (PA1993) are also down-regulated. Finally, the rest of the down-regulated transporters  
274 are putative MFS and ABC type transporters of unknown metabolites, except for a  
275 putative K<sup>+</sup> channel (PA1496) and YdfC (PA2777), a putative formic/nitrite transporter  
276 which was also found to be expressed under antibiotic stress [28, 29].  
277 Four members of the 8-gene operon *iscR*-PA3808 the ferredoxin Fdx2 (PA3809), the  
278 co-chaperone HscB (PA3811), the L-cysteine desulfurase IscS (PA3814), and the iron-  
279 sulphur cluster assembly transcription factor IscR (PA3815) are up-regulated,  
280 supporting previous observations about their expression in high concentration of salts  
281 [19]. Surprisingly, we did not find any significant up-regulation of the IscR-regulated  
282 ferredoxin FprB (PA4615), which are also associated with salt stress [30]. Other up-  
283 regulated genes are implicated in post-translational modifications such as *trmD*  
284 (PA3743; tRNA guanosine methyltransferase) and *endA* (PA2749; DNA-specific  
285 endonuclease I). Methylation of coding or non-coding RNA might play an important role  
286 in gene expression regulation [31]. Moreover, the S-adenosylmethionine decarboxylase

287 proenzyme (*speD*; PA0654), involved in spermidine biosynthesis, was up-regulated in  
288 the T48 variants. Interestingly, previous works reported that spermidine is effective in  
289 alleviating the adverse effect of salt stress on plants [32, 33]. A recent finding indicated  
290 that spermidine priming treatments enhanced the antioxidant systems in plants exposed  
291 to salt stress and contributed to improved ion homeostasis [32–34]. Similarly, in *P.*  
292 *aeruginosa*, Johnson *et al* [34] reported that spermidine plays an important function as  
293 an organic polycation to bind lipopolysaccharide and to stabilize the cell surface. It  
294 protects the outer membrane from aminoglycoside antibiotics, antimicrobial peptides,  
295 and oxidative stress.

296 Another up-regulated gene coding for a two-component system response regulator  
297 PmrA (PA4776), was identified in this study, which was recently reported to be  
298 associated with polymyxin resistance and hence osmotic stress [35].

299 The *rsmA* gene, known to be a regulator of the secondary metabolism and a carbon  
300 storage regulator, is down-regulated in salt-tolerant clones (Table 2). RsmA was found  
301 to play a very important role in early pathogenesis, especially in early colonisation and  
302 dissemination [36], due to its relevance in the expression of Type VI Secretory System  
303 (T6SS) [37, 38]. Moreover, *rsmA*-knockouts strains of *P. aeruginosa* have altered the  
304 expression of genes involved in a wide variety of pathways, including iron acquisition,  
305 formation of multidrug efflux pumps and motility [39]. The genes coding for TssK1  
306 (PA0079) and IcmF2 (PA1669) are also down-regulated. Both proteins are fundamental  
307 for the pathogenesis of *P. aeruginosa*, as the former is implied in the assembly of T6SS  
308 complex [40] while the latter is involved in the virulence [41].

309 Most of these T3SS proteins are members of the 12-gene operon *popN-popD*, which

310 are expressed not only in pathogenesis but also under different environmental stresses  
311 such as low concentration of  $\text{Ca}^{2+}$  or direct contact with host cells [42]. Additionally,  
312 ExoS and ExoT have an ADP-ribosyltransferase activity, playing an important role in the  
313 bacterial survival and dissemination in clinical strains [43, 44, 45].

314 Salt stress also showed impact on three metabolic genes that were up-regulated: the  
315 cytochrome *c* oxidase (*coxA*; PA0106), a putative acyl-CoA dehydrogenase (PA0508),  
316 and the anthranilate-coenzyme A ligase (*pqsA*; PA0996). Previously, the putative acyl-  
317 CoA dehydrogenase, a gene associated with changes in membrane fluidity [46], was  
318 found overexpressed in *Burkholderia pseudomallei* when treated with NaCl. The fact  
319 that *pqsA* is up-regulated may indicate that the *Pseudomonas* quinolone signal (PQS)  
320 could be also overexpressed during salt encapsulation. This protein shapes bacterial  
321 population structure to survive under stressful environments and kills sensitive bacteria  
322 at a time that promotes anti-oxidative stress response [47].

323 When transcriptional regulators are analysed, only a putative transcriptional regulator  
324 (PA0547) is up-regulated in T48, having a potential role in the differential regulation of  
325 gene expression. However, *hslU* (PA5054) and *dnaK* (PA4761) genes, which encode  
326 for chaperone activity are found significantly down-regulated. This observation is in  
327 contrast with previous studies, where *dnaK* was overexpressed, being relevant in salt  
328 resistance in *Lactococcus lactis* [48]. Moreover, *dnaK* was also found up-regulated in  
329 marine bacteria allowing the adaptation to cold environments [49]. Possibly, these  
330 chaperones were up-regulated in salt-trapped bacteria but, once the T48 variant was  
331 recovered, these genes are quickly down-regulated due to other salt stress adaptations,  
332 the same maybe true for other genes.

333 CgrA (PA2127), which is found to be related to the expression of RsmN and, thus, the  
334 repression of RsmA [38], is up-regulated in T48 variant. The *cgrA* gene plays a key role  
335 in the expression of fimbrial genes and is related to MvaT mutants or anaerobic growth  
336 [50]. Despite the fact that only *nark1* (PA3877) was found to be up-regulated, results  
337 indicate that most of the up-regulated genes in T48 are associated to aerobic growth.  
338 Additionally, no mutations in the MvaT transcriptional regulator were revealed by whole  
339 genome analysis.

340 According to our results, salt resistance could be considered as a priming response, i.e.  
341 as a physiological process by which organisms prepare themselves for more quick or  
342 aggressive situations to future biotic or abiotic stress [51]. Although this phenomenon  
343 has been studied mostly in plants, there are also some examples of priming in the  
344 bacterial world. One critical issue is to explore how the signals that induce priming are  
345 received and transduced by the cells and prepare the bacteria for long-term persistence  
346 if growth is not possible. In plants, priming to salinity plays an important role as adaptive  
347 phenotypic strategy [52]. This process could develop different defence mechanisms in  
348 the cells against salinity stress such as antioxidant defence systems, the repair of  
349 membranes and the osmotic adjustment [53]. This kind of response is characterised,  
350 essentially, by the slow induction of many genes that together contribute to the  
351 acquisition of quick and effective adaptive strategy against stressor conditions. In such  
352 cases, molecular mechanisms responsible for priming effects are involved in the  
353 accumulation of signalling proteins or transcription factors [54], as well as epigenetic  
354 mechanisms [55, 56]. These epigenetic mechanisms are thought to bring a faster and  
355 more potent response to subsequent exposure to stress. This idea is supported for the

356 Gene Ontology analysis, which suggested that some genes were involved in regulation  
357 of transcription, methylation process, response to stimulus, RNA metabolic processes  
358 and quorum sensing.

359 Interestingly, neither the mutants nor the wild-type were able to grow in DM with 1  
360 M NaCl. All these genes showed a decreased transcription in the T48 variant and,  
361 consequently, if they are involved in adaptation to hypersalinity, a better growth  
362 under high NaCl concentration is expected when inactivated. Moreover, no  
363 sequence changes between the five genes from T0 and T48 were found, suggesting  
364 that the differences in growth under high salt conditions may be due to differential  
365 regulation, which requires further research to be clarified. The preservation of a  
366 long-lasting phenotype is not new in bacteria. For instance, the lactose  
367 metabolization response in *Escherichia coli* is maintained during more than ten  
368 generations after the removal of lactose due to the inheritance of very stable  
369 proteins [57].

370

## 371 **Conclusions**

372 *Pseudomonas aeruginosa* can survive in inclusions of seawater crystals for many years.  
373 Upon recovery, this bacterium shows a better ability to grow in highly saline conditions,  
374 and the adaptation seems to be only phenotypic but not genetic, indicating a 'priming'  
375 phenomenon in this plastic bacterium. Although we have identified several genes  
376 potentially involved in adaptation to saline environments, the exact mechanisms which  
377 are responsible for priming in *P. aeruginosa* remain unclear. Our study provides a good  
378 start toward a deep understanding of the long-term salt stress behaviour of *P.*  
379 *aeruginosa*.



380

381

382

383

## 384 **Methods**

385 **Bacterial model and growth conditions.** *P. aeruginosa* ATCC 27853 (wild-type: T0 in  
386 this study) was grown overnight at 37°C in nutrient broth, centrifuged at 13,000 rpm for  
387 10 min, washed three times and then suspended in filtered sterilise seawater to a final  
388 concentration of approximately 10<sup>9</sup> CFU/ml in three independent replicas. Cells were  
389 incubated during fourteen years in closed Erlenmeyer flasks at room temperature. The  
390 concentration of salts in the used seawater was 37 g/l. The water was allowed to  
391 evaporate, the saline crystals were apparent after eight months, and the culture became  
392 completely desiccated after ten months. The initial number of CFU/ml was confirmed by  
393 serial decimal dilutions in nutrient agar.

394

395 **Revitalisation of the bacterial cells.** *P. aeruginosa* cells, maintained during fourteen  
396 years in sterilised seawater, were revitalised by the addition of 100 ml of sterilised  
397 nutrient broth to the salt crystal in the Erlenmeyer flask and incubated at 37°C with 100  
398 rpm of shaking. Subsequent plating of an aliquot from this culture on nutrient agar  
399 yielded observable colonies. A few isolated colonies from the different replicas were  
400 recovered and saved for further analysis. Biochemical profiles of *P. aeruginosa* ATCC

401 27853 and the resuscitated cells (T48 variant in this study) were characterised using  
402 API 20NE system (bio-Merieux, France).

403

404 **Evaluation of fitness in different salinity conditions.** Bacterial growth curves were  
405 carried out in flat-bottomed 96-well microplates (Nunc, Denmark). Each well was filled  
406 with 100 µl of Davis Minimal medium (DM: Na<sub>2</sub>HPO<sub>4</sub> 6.78g/l; KH<sub>2</sub>PO<sub>4</sub> 3g/l; NaCl 0.5g/l;  
407 NH<sub>4</sub>Cl 1g/l; 1 mM MgSO<sub>4</sub>; 0.1 mM CaCl<sub>2</sub>, 0.28% Glucose and 0.25% casamino acids),  
408 supplemented with NaCl to final concentrations of 2M, 1M, 500mM, 250mM and 8.5mM.  
409 Overnight cultures of T0 and T48

410 *P. aeruginosa* cells were added to a final OD<sub>595</sub> of 0.04. The growth of T0 and T48  
411 variants was followed with four replicas of each one in the same concentrations of NaCl.  
412 Microplates were incubated in an Infinite F200 TECAN microplate reader for 24 hours at  
413 37°C with 15s of shaking duration, 3mm of shaking amplitude. The interval time of  
414 absorbance measurements at 595nm was 15min. The same manipulation was repeated  
415 adding 100mM KCl to selected concentrations of NaCl.

416

417 **Whole genome sequencing after recovery from salt.** Libraries were prepared using a  
418 TruSeq DNA PCR-Free Library Preparation Kit (Illumina, USA) and were sequenced on  
419 an Illumina-MiSeq system using a 600-cycle v3 reagent kit, resulting in 300-bp paired-  
420 end reads. Sequence data are available from the NCBI database under Bioproject  
421 accession PRJNA420955. A reference genome for strain

422 *P. aeruginosa* ATCC 27853 was assembled using A5-miseq version 20140604 and  
423 annotated using prokka version 1.12-beta [59]. Snippy version 3.2 [60] was used to

424 identify variants in strains c1-5 (clone1 to clone5) relative to the reference complete  
425 genome of *P. aeruginosa* ATCC 27853 (Genbank accession CP015117). Assembly of  
426 1,818,724 error-corrected reads (estimated 47.68-fold coverage) resulted in 46 contigs  
427 with an N50 of 353 kb and a total size of 6.79 Mb.

428

429 **Transcriptome profiling of salt-trapped *P. aeruginosa*.** To find out what genes  
430 are involved in the differential salinity resistance, global transcription profile of  
431 cultures of *P. aeruginosa* T0 and its derivative T48 variant were carried out using  
432 microarray technology. Bacterial cells were grown overnight in Davis minimal  
433 medium (DM) at 37°C under 200 rpm of shaking. Three independent 1/50 dilutions  
434 of each of them were grown until they reached an optical density of 0.5 at 600 nm.  
435 The cells were washed and resuspended in DM supplemented with RNA protect  
436 reagent (Qiagen, Germany). Cell lysis and total RNA extractions were performed  
437 with the RNeasy mini kit according to the manufacturer's recommendations  
438 (Qiagen, Chatsworth, CA), except that 1 mg/ml of lysozyme was used to lyse  
439 *Pseudomonas* cells. DNase digestions were carried out on the column by adding 82  
440 units of Kunitz enzyme (Qiagen) with incubation at room temperature for 15 min. An  
441 additional DNase digestion was performed on the purified RNA to ensure the  
442 absence of DNA. RNA quality was checked through agarose electrophoresis before  
443 cDNA synthesis. Fluorescently labelled cDNA for microarray hybridisation was  
444 obtained by using the SuperScript Indirect cDNA Labelling System (Invitrogen) as  
445 recommended by the supplier. Briefly, 20 µg of total RNA was transformed to cDNA  
446 with Superscript III reverse transcriptase using random hexamers as primers and  
447 including aminoalyl-modified nucleotides in the reaction mixture. After cDNA  
448 purification, Cy3 or Cy5 fluorescent dye (Amersham Biosciences) was coupled to the

449 amino-modified first-strand cDNA. The labelling efficiency was assessed by using a  
450 NanoDrop ND1000 spectrophotometer (NanoDrop Technologies). Equal amounts of  
451 Cy3- or Cy5-labelled cDNAs, one of them corresponding to the control and the other  
452 to the problem under analysis, were mixed and dried in a Speed-Vac. Labelled cDNA  
453 was hybridised to *P. aeruginosa* microarray slides version 2 from the Pathogen  
454 Functional Genomics Resource Center from J. Craig Venter Institute Microbial  
455 Hybridization of Labelled Probes protocol. Following hybridization, the slides were  
456 washed, dried, and scanned using a ScanArray Express scanner and software  
457 (Packard BioScienceBioChip Technologies). For the analysis of DNA microarray  
458 slides, background correction and normalization of expression data were performed  
459 using LIMMA [61]. To avoid the exaggerated variability of log ratios for low-intensity  
460 spots during local background correction, we used the *normexp* method in LIMMA to  
461 adjust the local median background estimates. The resulting log ratios were print-  
462 tip LOESS normalised for each array [62]. Only genes that exhibited changes  
463 compared to the wild-type control of two-fold and more, as well as P values of  
464  $\leq 0.05$ , were considered in the study. Finally, to explore the functional roles of the  
465 regulated genes, the Gene Ontology (GO) analysis was performed through the  
466 PANTHER online software [63] and QuickGO tool [64].

467 **Salt tolerance assay of *P. aeruginosa* mutants.** The desired mutants were isolated  
468 from PA14 transposon insertion mutants [65]. The selected *P. aeruginosa* PA14  
469 mutants, with deletions in genes showing transcriptional variation in the microarray  
470 experiments, were used. Salt tolerance of these mutants was measured and compared  
471 to the wild-type strain PA14. The salt tolerance assay was performed on 96-well  
472 polystyrene plates. Each well was filled with 100  $\mu$ l of DM minimal medium  
473 supplemented with NaCl to final concentrations of 8.5 mM (DM with no NaCl added),

474 250 mM and 500 mM, with four replicas for each NaCl concentration. The microplates  
475 were incubated at 37°C, and the optical density at 600 nm was measured after 24  
476 hours. For mutants showing statistically significant differences in growth respect the  
477 wild-type strain on NaCl (>25%), salt tolerance assay was repeated for each sodium  
478 chloride concentration.

479

480 **Statistical analysis.** All parameters for the growth curves were estimated using  
481 Growthcurver [66]. Using this data, all model parameters —carrying capacity, initial  
482 population size, growth rate, doubling time and the empirical area under the curve—for  
483 all growth curves of both variants, T0 and T48, were compared using Student's *t* test  
484 according to the different NaCl and KCl concentrations. Additionally, two-sided  
485 Kolmogorov-Smirnov tests were applied to compare the growth curves per treatments.  
486 *P* values less than or equal to 0.05 were considered statistically significant. All statistical  
487 tests were performed in R v. 3.4.4 [67].

488

#### 489 **Acknowledgements**

490 We are grateful to Prof. Jens Rolff for support and helpful comments from Yeliz Karatas,  
491 Arpita Nath from Freie Universität Berlin and Dr Paul Smith.

492

#### 493 **Funding**

494

495 This work was supported by Grants PI10/00105 and REIPI RD06/0008, both from  
496 Ministerio de Ciencia e Innovación, Instituto de Salud Carlos III, the last co-financed by  
497 European Development Regional Fund "A way to achieve Europe" ERDF, Spanish  
498 Network for Research in Infectious Diseases (REIPI RD06/0008) and by the PAR  
499 project (Ref 241476) from the EU 7th Framework Programme. ARR was also supported  
500 SFB 973 (Deutsche Forschungsgemeinschaft, project C5).

501

502 **Availability of data and materials**

503

504 All data are available in the manuscript and supplementary material. The sequences  
505 and genomic data were deposited as indicated in the manuscript.

506

507 **Authors' contributions**

508

509 EH, EGT, CIQ, AB, KG and ARR carried out the experimental work. ARR and JB  
510 designed the experimental work. PJ contributed with genome sequencing and analysis.  
511 All authors conducted analytical work. EH and ARR drafted the manuscript with input  
512 from all authors. All authors read and approved the final manuscript.

513

514 **Ethics approval and consent to participate**

515 Not applicable.

516

517 **Consent for publication**

518 Not applicable.

519

520 **Competing interests**

521 Authors declare that they have no competing interests.

522

523

524

525

526

527

528

529

530

531

532

533

534

535

536

537

538

539

540 **References**

541 1. Hengge-Aronis R. The general stress response in *Escherichia coli*. In: Hengge-Aronis

542 GS and R, editor. *Bacterial Stress Responses*. Washington, D.C.: ASM Press,; 2000. p.

543 161–78.

544 2. Lowenstein TK, Schubert BA, Timofeeff MN. Microbial communities in fluid inclusions

545 and long-term survival in halite. *GSA Today*. 2011;21:4–9. doi:10.1130/GSATG81A.1.

546 3. McGenity TJ, Gemmell RT, Grant WD, Stan-Lotter H. Origins of halophilic

547 microorganisms in ancient salt deposits. Minireview. *Environ Microbiol*. 2000;2:243–50.

548 doi:10.1046/j.1462-2920.2000.00105.x.

549 4. Norton CF, Grant WD. Survival of Halobacteria Within Fluid Inclusions in Salt

550 Crystals. *J Gen Microbiol*. 1988;134:1365–1.

551 5. Adamski JC, Roberts JA, Goldstein RH. Entrapment of Bacteria in Fluid Inclusions in

552 Laboratory-Grown Halite. *Astrobiology*. 2006;6:552–62. doi:10.1089/ast.2006.6.552.

553 6. Fendrihan S, Legat A, Pfaffenhuemer M, Gruber C, Weidler G, Gerbl F, et al.

554 Extremely halophilic archaea and the issue of long-term microbial survival. *Re/views*

- 555 Environ Sci bio/technology. 2006;5:203–18. doi:10.1007/s11157-006-0007-y.
- 556 7. Schubert BA, Lowenstein TK, Timofeeff MN, Parker MA. Halophilic *Archaea* cultured  
557 from ancient halite, Death Valley, California. Environ Microbiol. 2010;12:440–54.  
558 doi:10.1111/j.1462-2920.2009.02086.x.
- 559 8. Stover CK, Pham XQ, Erwin AL, Mizoguchi SD, Warren P, Hickey MJ, et al.  
560 Complete genome sequence of *Pseudomonas aeruginosa* PAO1, an opportunistic  
561 pathogen. Nature. 2000;406:959–64. doi:10.1038/35023079.
- 562 9. Rodrigue A, Quentin Y, Lazdunski A, Méjean V, Foglino M. Cell signalling by  
563 oligosaccharides. Two-component systems in *Pseudomonas aeruginosa*: why so  
564 many? Trends Microbiol. 2000;8:498–504.
- 565 10. Langton Hewer SC, Smyth AR. Antibiotic strategies for eradicating *Pseudomonas*  
566 *aeruginosa* in people with cystic fibrosis. Cochrane Database Syst Rev.  
567 2017;4:CD004197.
- 568 11. Snitkin ES, Segre JA. *Pseudomonas aeruginosa* adaptation to human hosts. Nat  
569 Genet. 2015;47:2–3. doi:10.1038/ng.3172.
- 570 12. Epstein W. The roles and regulation of potassium in bacteria. Prog Nucleic Acid Res  
571 Mol Biol. 2003;75:293–320. <http://www.ncbi.nlm.nih.gov/pubmed/14604015>. Accessed 4  
572 May 2018.
- 573 13. Aspedon A, Palmer K, Whiteley M. Microarray analysis of the osmotic stress  
574 response in *Pseudomonas aeruginosa*. J Bacteriol. 2006;188:2721–5. doi:188/7/2721  
575 [pii] 10.1128/JB.188.7.2721-2725.2006.
- 576 14. Romsang A, Duang-Nkern J, Leesukon P, Saninjuk K, Vattanaviboon P,  
577 Mongkolsuk S. The Iron-Sulphur Cluster Biosynthesis Regulator IscR Contributes to



- 578 Iron Homeostasis and Resistance to Oxidants in *Pseudomonas aeruginosa*. PLoS One.  
579 2014;9:e86763.
- 580 15. Csonka LN. Physiological and genetic responses of bacteria to osmotic stress.  
581 Microbiol Rev. 1989;53:121–47. <http://www.ncbi.nlm.nih.gov/pubmed/2651863>.  
582 Accessed 4 May 2018.
- 583 16. Kixmüller D, Greie J-C. An ATP-driven potassium pump promotes long-term survival  
584 of *Halobacterium salinarum* within salt crystals. Environ Microbiol Rep. 2012;4:234–41.  
585 doi:10.1111/j.1758-2229.2012.00326.x.
- 586 17. Juárez O, Barquera B. Insights into the mechanism of electron transfer and sodium  
587 translocation of the Na(+)-pumping NADH:quinone oxidoreductase. Biochim Biophys  
588 Acta. 2012;1817:1823–32. doi:10.1016/j.bbabi.2012.03.017.
- 589 18. Juárez O, Athearn K, Gillespie P, Barquera B. Acid residues in the transmembrane  
590 helices of the Na+-pumping NADH:quinone oxidoreductase from *Vibrio cholerae*  
591 involved in sodium translocation. Biochemistry. 2009;48:9516–24.  
592 doi:10.1021/bi900845y.
- 593 19. Romsang A, Duang-Nkern J, Wirathorn W, Vattanaviboon P, Mongkolsuk S.  
594 *Pseudomonas aeruginosa* IscR-Regulated Ferredoxin NADP(+) Reductase Gene (*fprB*)  
595 Functions in Iron-Sulfur Cluster Biogenesis and Multiple Stress Response. PLoS One.  
596 2015;10:e0134374.
- 597 20. Hreha TN, Mezic KG, Hecce HD, Duffy EB, Bourges A, Pryshchep S, et al.  
598 Complete topology of the RNF complex from *Vibrio cholerae*. Biochemistry.  
599 2015;54:2443–55.
- 600 21. Reyes-Prieto A, Barquera B, Juárez O. Origin and Evolution of the Sodium -

- 601 Pumping NADH: Ubiquinone Oxidoreductase. PLoS One. 2014;9:e96696.
- 602 22. Li K, Pidatala RR, Ramakrishna W. Mutational, proteomic and metabolomic analysis  
603 of a plant growth promoting copper-resistant *Pseudomonas* spp. FEMS Microbiol Lett.  
604 2012;335:140–8.
- 605 23. Jain S, Bhatt A. Molecular and in situ characterization of cadmium-resistant  
606 diversified extremophilic strains of *Pseudomonas* for their bioremediation potential. 3  
607 Biotech. 2014;4:297–304.
- 608 24. Chong TM, Yin W-F, Chen J-W, Mondy S, Grandclément C, Faure D, et al.  
609 Comprehensive genomic and phenotypic metal resistance profile of *Pseudomonas*  
610 putida strain S13.1.2 isolated from a vineyard soil. AMB Express. 2016;6:95.
- 611 25. Khanam S, Guragain M, Lenaburg DL, Kubat R, Patrauchan MA. Calcium induces  
612 tobramycin resistance in *Pseudomonas aeruginosa* by regulating RND efflux pumps.  
613 Cell Calcium. 2017;61:32–43.
- 614 26. Sharma V, Noriega CE, Rowe JJ. Involvement of NarK1 and NarK2 Proteins in  
615 Transport of Nitrate and Nitrite in the Denitrifying Bacterium *Pseudomonas aeruginosa*  
616 PAO1. Appl Environ Microbiol. 2006;72:695–701.
- 617 27. Jo JTH, Brinkman FSL, Hancock REW. Aminoglycoside efflux in *Pseudomonas*  
618 *aeruginosa*: involvement of novel outer membrane proteins. Antimicrob Agents  
619 Chemother. 2003;47:1101–11.
- 620 28. Skindersoe ME, Alhede M, Phipps R, Yang L, Jensen PO, Rasmussen TB, et al.  
621 Effects of antibiotics on quorum sensing in *Pseudomonas aeruginosa*. Antimicrob  
622 Agents Chemother. 2008;52:3648–63.
- 623 29. Zhu Y, Czauderna T, Zhao J, Klapperstueck M, Maifiah MHM, Han M-L, et al.

- 624 Genome-scale metabolic modeling of responses to polymyxins in *Pseudomonas*  
625 *aeruginosa*. *Gigascience*. 2018;7.
- 626 30. Roundtree IA, Evans ME, Pan T, He C. Dynamic RNA Modifications in Gene  
627 Expression Regulation. *Cell*. 2017;169:1187–200. doi:10.1016/j.cell.2017.05.045.
- 628 31. Li S, Jin H, Zhang Q. The Effect of Exogenous Spermidine Concentration on  
629 Polyamine Metabolism and Salt Tolerance in Zoysiagrass (*Zoysia japonica* Steud)  
630 Subjected to Short-Term Salinity Stress. *Front Plant Sci*. 2016;7:1221.  
631 doi:10.3389/fpls.2016.01221.
- 632 32. Liu HP, Dong BH, Zhang YY, Liu ZP, Liu YL. Relationship between osmotic stress  
633 and the levels of free, conjugated and bound polyamines in leaves of wheat seedlings.  
634 *Plant Sci*. 2004;166:1261–7. doi:10.1016/J.PLANTSCI.2003.12.039.
- 635 33. Li J, Hu L, Zhang L, Pan X, Hu X. Exogenous spermidine is enhancing tomato  
636 tolerance to salinity–alkalinity stress by regulating chloroplast antioxidant system and  
637 chlorophyll metabolism. *BMC Plant Biol*. 2015;15:303. doi:10.1186/s12870-015-0699-7.
- 638 34. Johnson L, Mulcahy H, Kanevets U, Shi Y, Lewenza S. Surface-Localized  
639 Spermidine Protects the *Pseudomonas aeruginosa* Outer Membrane from Antibiotic  
640 Treatment and Oxidative Stress. *J Bacteriol*. 2012;194:813–26. doi:10.1128/JB.05230-  
641 11.
- 642 35. Lou Y-C, Weng T-H, Li Y-C, Kao Y-F, Lin W-F, Peng H-L, et al. Structure and  
643 dynamics of polymyxin-resistance-associated response regulator PmrA in complex with  
644 promoter DNA. *Nat Commun*. 2015;6:8838.
- 645 36. Mulcahy H, O’Callaghan J, O’Grady EP, Maciá MD, Borrell N, Gómez C, et al.  
646 *Pseudomonas aeruginosa* RsmA plays an important role during murine infection by

647 influencing colonization, virulence, persistence, and pulmonary inflammation. *Infect*  
648 *Immun.* 2008;76:632–8.

649 37. Allsopp LP, Wood TE, Howard SA, Maggiorelli F, Nolan LM, Wettstadt S, et al.  
650 RsmA and AmrZ orchestrate the assembly of all three type VI secretion systems in  
651 *Pseudomonas aeruginosa*. *Proc Natl Acad Sci U S A.* 2017;114:7707–12.

652 38. Romero M, Silistre H, Lovelock L, Wright VJ, Chan K-G, Hong K-W, et al. Genome-  
653 wide mapping of the RNA targets of the *Pseudomonas aeruginosa* riboregulatory  
654 protein RsmN. *Nucleic Acids Res.* 2018.

655 39. Burrowes E, Baysse C, Adams C, O’Gara F. Influence of the regulatory protein  
656 RsmA on cellular functions in *Pseudomonas aeruginosa* PAO1, as revealed by  
657 transcriptome analysis. *Microbiology.* 2006;152:405–18.

658 40. Zoued A, Durand E, Bebeacua C, Brunet YR, Douzi B, Cambillau C, et al. TssK is a  
659 trimeric cytoplasmic protein interacting with components of both phage-like and  
660 membrane anchoring complexes of the type VI secretion system. *J Biol Chem.*  
661 2013;288:27031–41.

662 41. Lin J, Cheng J, Chen K, Guo C, Zhang W, Yang X, et al. The *icmF3* locus is  
663 involved in multiple adaptation- and virulence-related characteristics in *Pseudomonas*  
664 *aeruginosa* PAO1. *Front Cell Infect Microbiol.* 2015;5:70.

665 42. Yang H, Shan Z, Kim J, Wu W, Lian W, Zeng L, et al. Regulatory role of PopN and  
666 its interacting partners in type III secretion of *Pseudomonas aeruginosa*. *J Bacteriol.*  
667 2007;189:2599–609.

668 43. Sun Y, Karmakar M, Taylor PR, Rietsch A, Pearlman E. ExoS and ExoT ADP  
669 ribosyltransferase activities mediate *Pseudomonas aeruginosa* keratitis by promoting

- 670 neutrophil apoptosis and bacterial survival. *J Immunol.* 2012;188:1884–95.
- 671 44. Rangel SM, Diaz MH, Knoten CA, Zhang A, Hauser AR. The Role of ExoS in  
672 Dissemination of *Pseudomonas aeruginosa* during Pneumonia. *PLOS Pathog.*  
673 2015;11:e1004945.
- 674 45. Li K, Xu C, Jin Y, Sun Z, Liu C, Shi J, et al. SuhB is a regulator of multiple virulence  
675 genes and essential for pathogenesis of *Pseudomonas aeruginosa*. *MBio.*  
676 2013;4:e00419-13.
- 677 46. Pumirat P, Cuccui J, Stabler RA, Stevens JM, Muangsombut V, Singuksawat E, et  
678 al. Global transcriptional profiling of *Burkholderia pseudomallei* under salt stress reveals  
679 differential effects on the Bsa type III secretion system. *BMC Microbiol.* 2010;10:171.
- 680 47. Häussler S, Becker T. The *Pseudomonas* Quinolone Signal (PQS) Balances Life  
681 and Death in *Pseudomonas aeruginosa* Populations. *PLoS Pathog.* 2008;4:e1000166.  
682 doi:10.1371/journal.ppat.1000166.
- 683 48. Sévin DC, Stählin JN, Pollak GR, Kuehne A, Sauer U. Global Metabolic Responses  
684 to Salt Stress in Fifteen Species. *PLoS One.* 2016;11:e0148888.
- 685 49. Kilstrup M, Jacobsen S, Hammer K, Vogensen FK. Induction of heat shock proteins  
686 DnaK, GroEL, and GroES by salt stress in *Lactococcus lactis*. *Appl Environ Microbiol.*  
687 1997;63:1826–37.
- 688 50. García-Descalzo L, Alcazar A, Baquero F, Cid C. Identification of in vivo HSP90-  
689 interacting proteins reveals modularity of HSP90 complexes is dependent on the  
690 environment in psychrophilic bacteria. *Cell Stress Chaperones.* 2011;16:203–18.
- 691 51. Vallet-Gely I, Sharp JS, Dove SL. Local and global regulators linking anaerobiosis to  
692 cupA fimbrial gene expression in *Pseudomonas aeruginosa*. *J Bacteriol.*

693 2007;189:8667–76.

694 52. Hilker M, Schwachtje J, Baier M, Balazadeh S, Bäurle I, Geiselhardt S, et al.

695 Priming and memory of stress responses in organisms lacking a nervous system. *Biol*

696 *Rev Camb Philos Soc.* 2015. doi:10.1111/brv.12215.

697 53. Molassiotis A, Tanou G, Diamantidis G. NO says more than “YES” to salt tolerance:

698 Salt priming and systemic nitric oxide signaling in plants. *Plant Signal Behav.*

699 2010;5:209–12. <http://www.ncbi.nlm.nih.gov/pubmed/20061805>. Accessed 26 Jun 2018.

700 54. Ibrahim EA. Seed priming to alleviate salinity stress in germinating seeds. *J Plant*

701 *Physiol.* 2016;192:38–46. doi:10.1016/j.jplph.2015.12.011.

702

Strains —●— T0 (original WT) —●— T48 (14 years in seawater salt crystals)

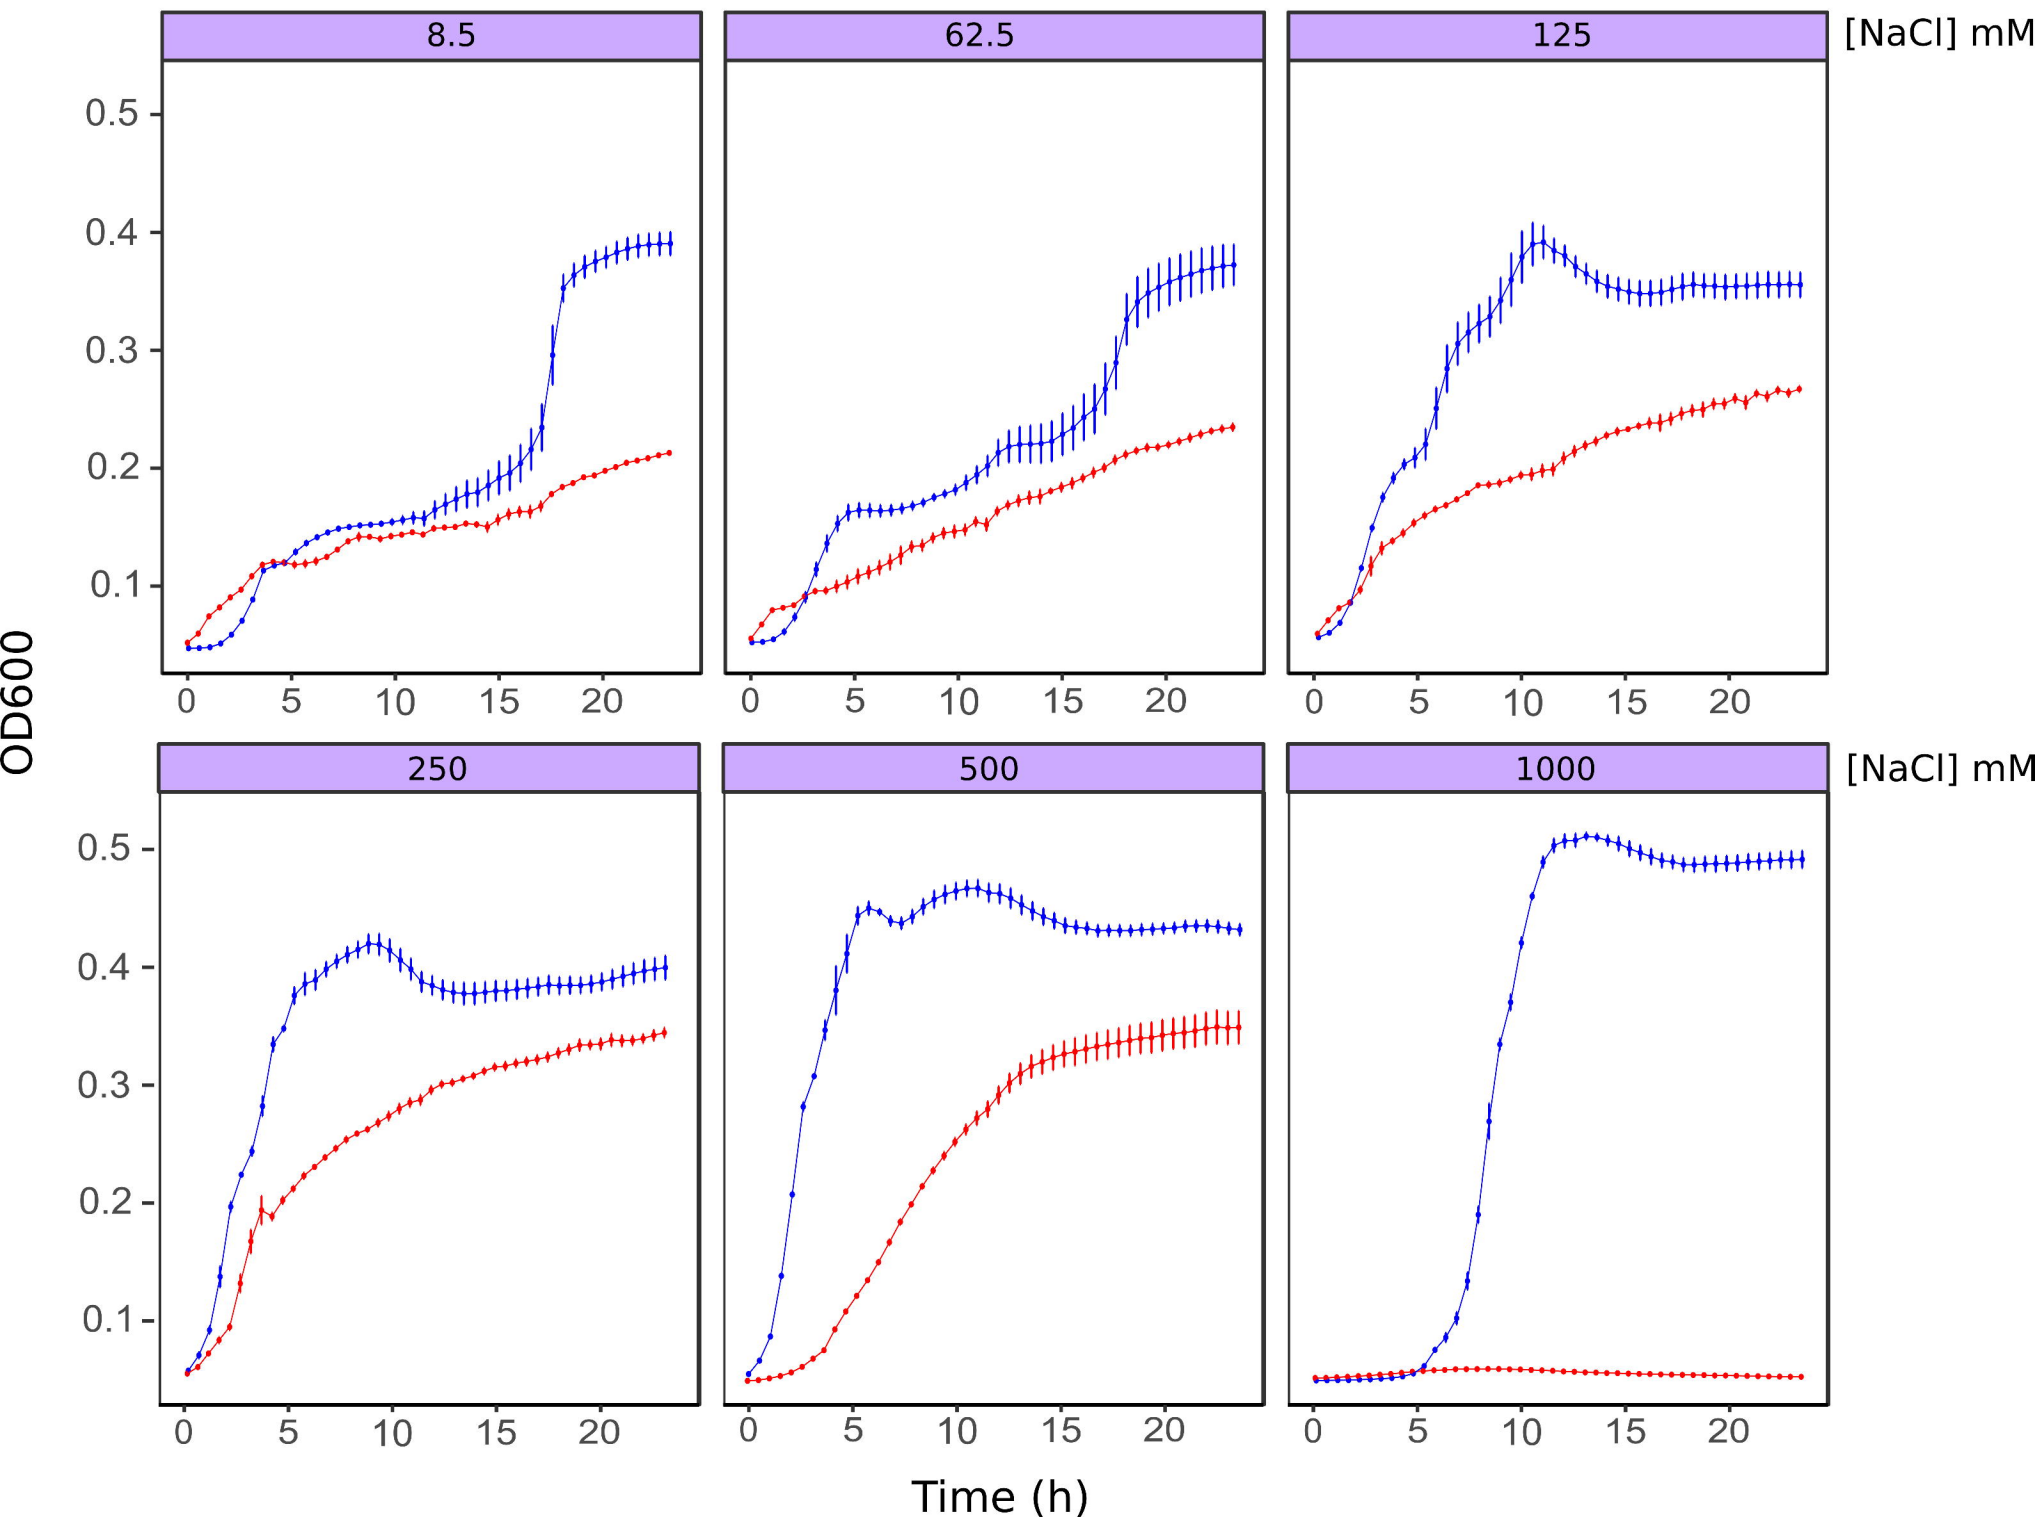

Strains

—●— T0 (original WT)

—●— T48 (14 years in seawater salt crystals)

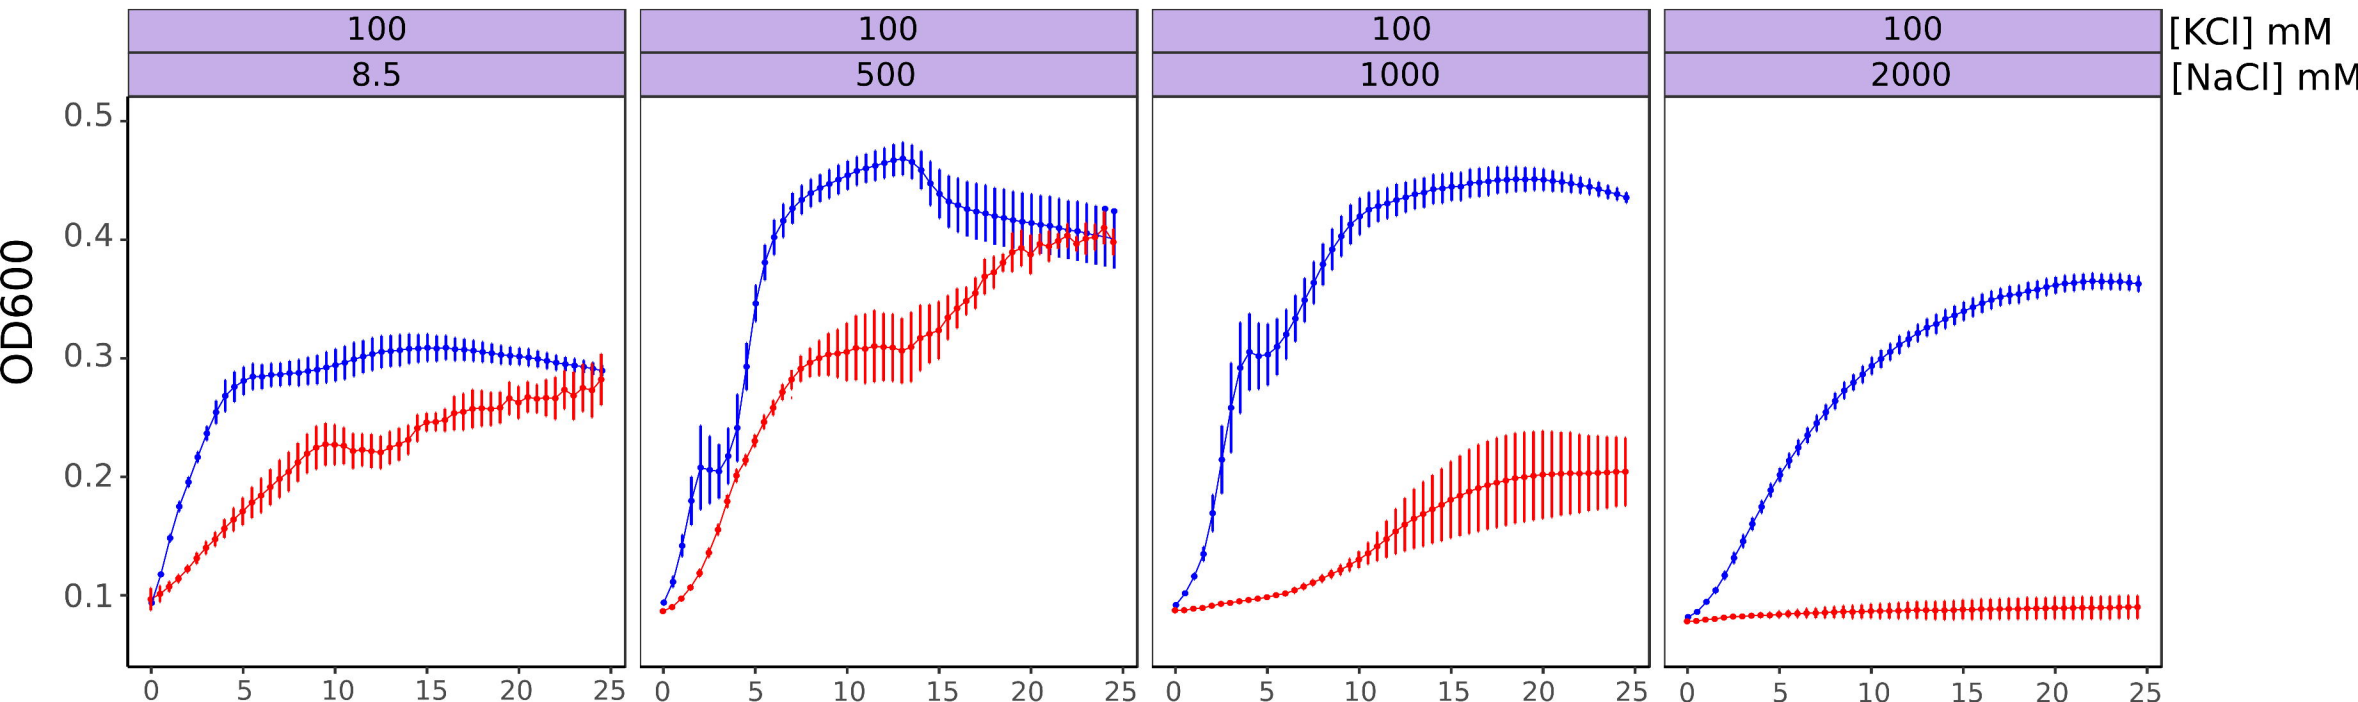



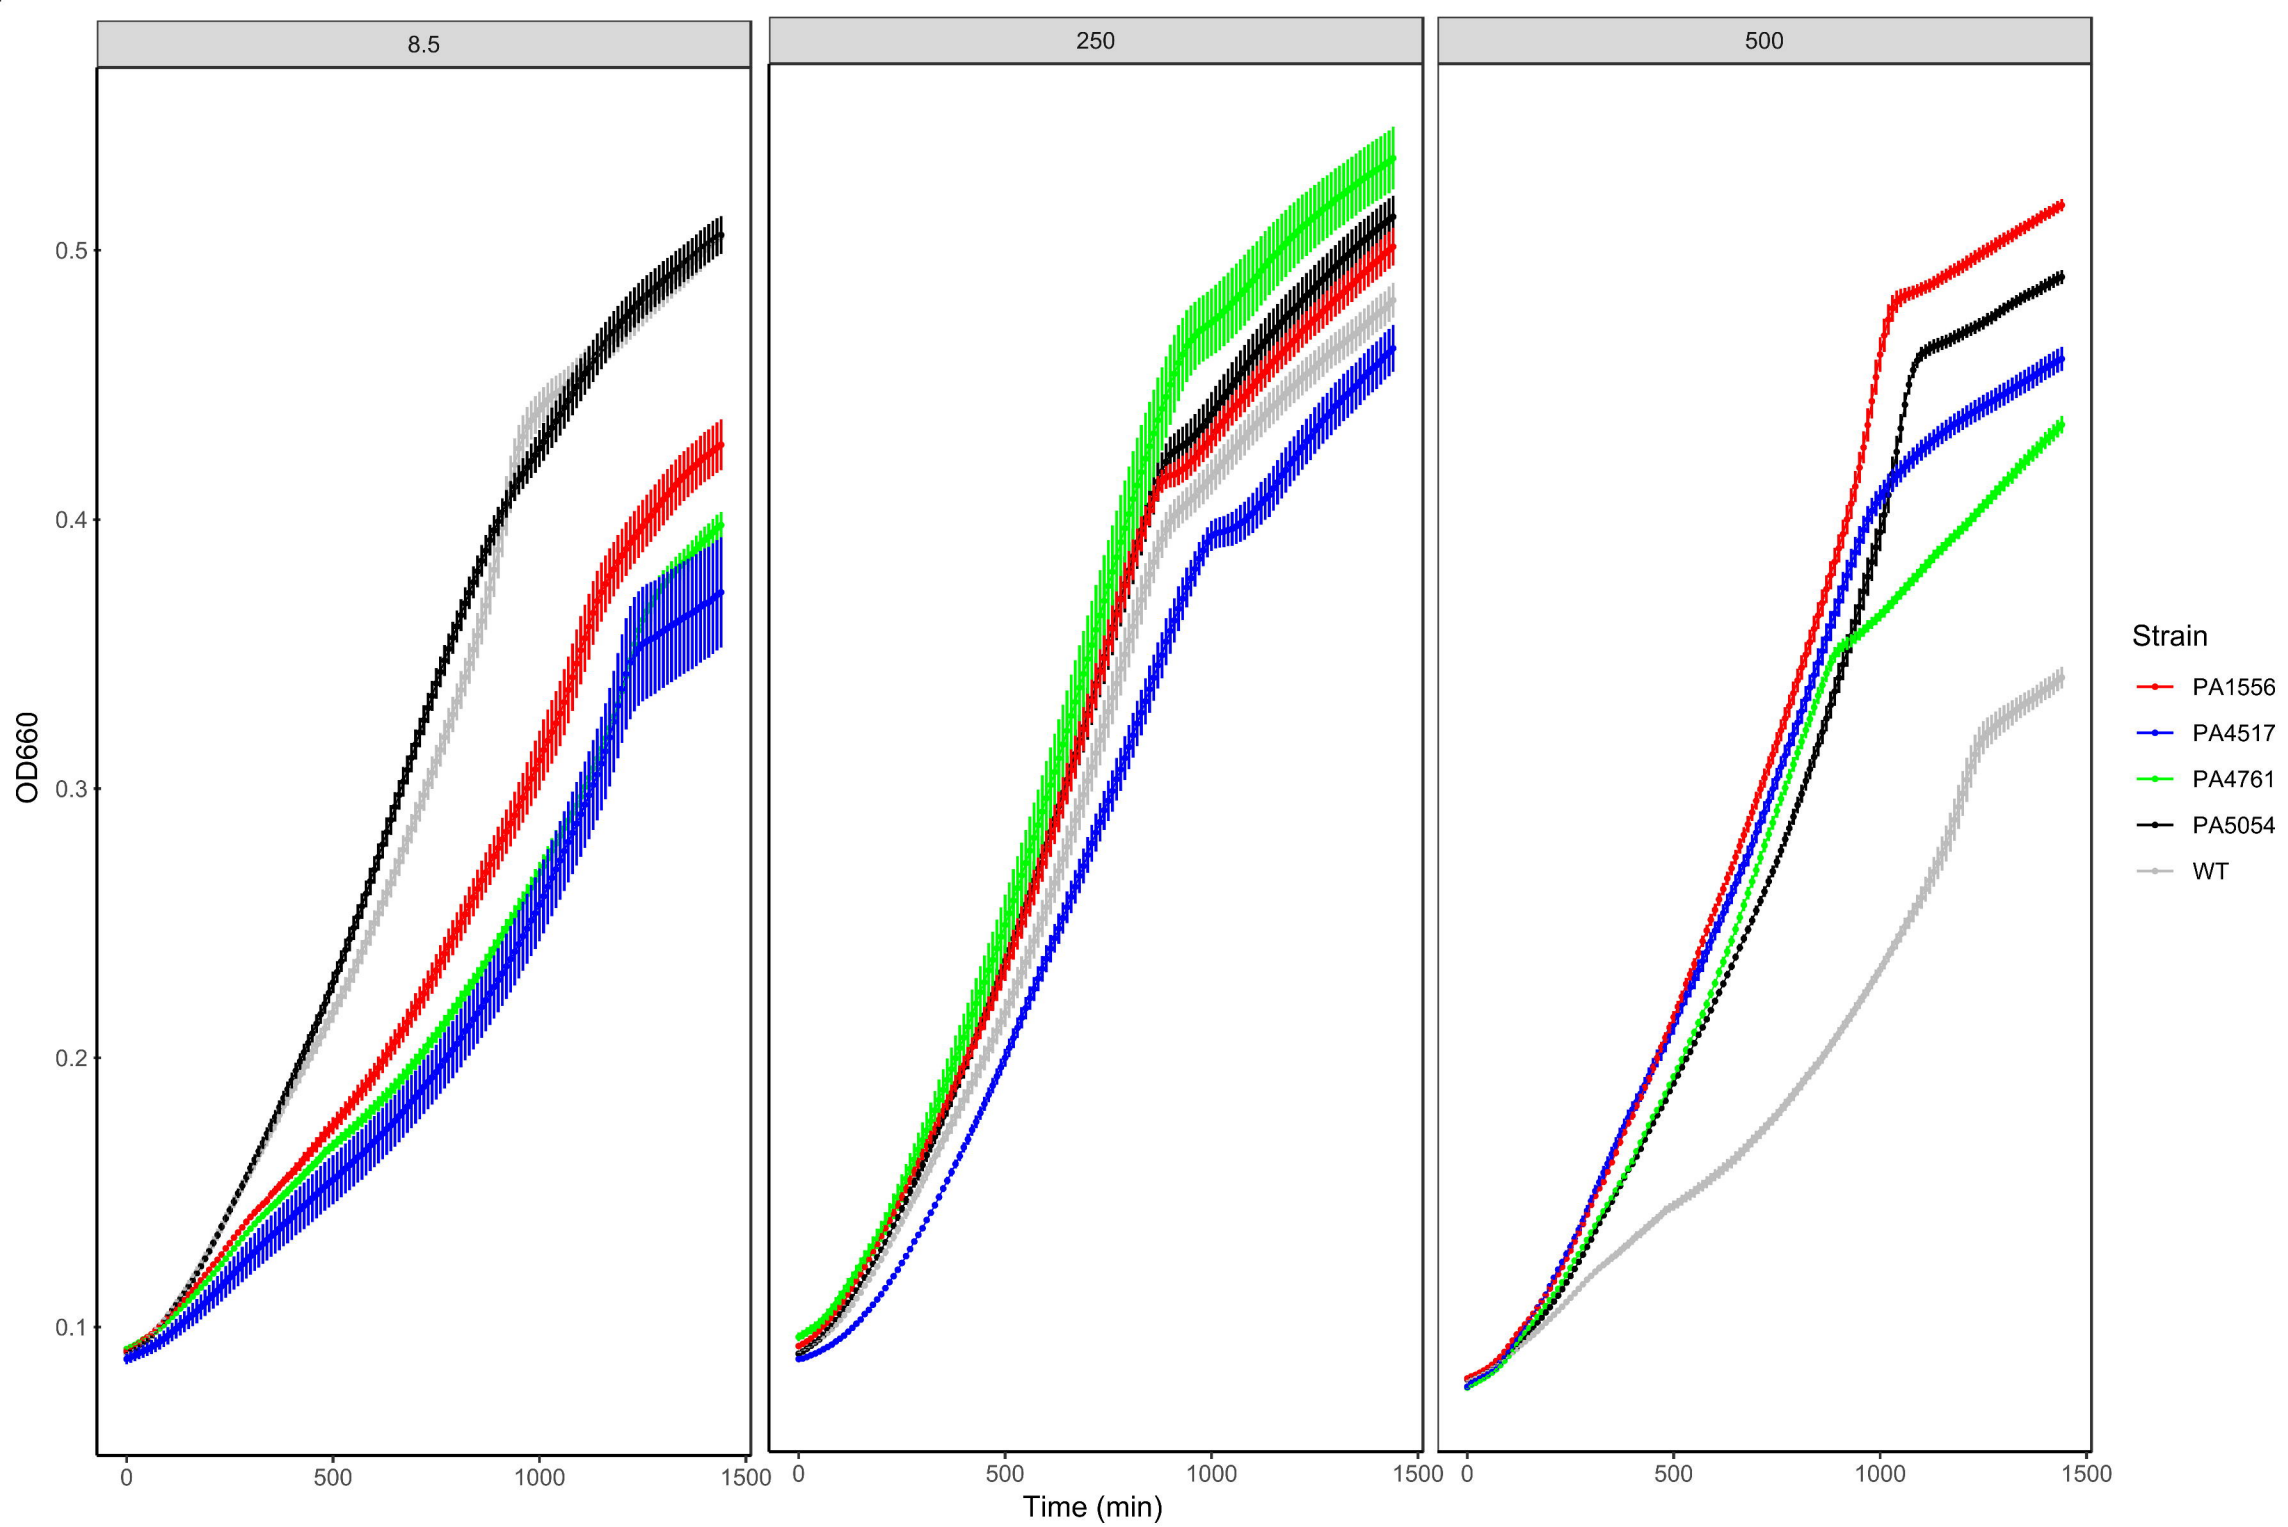

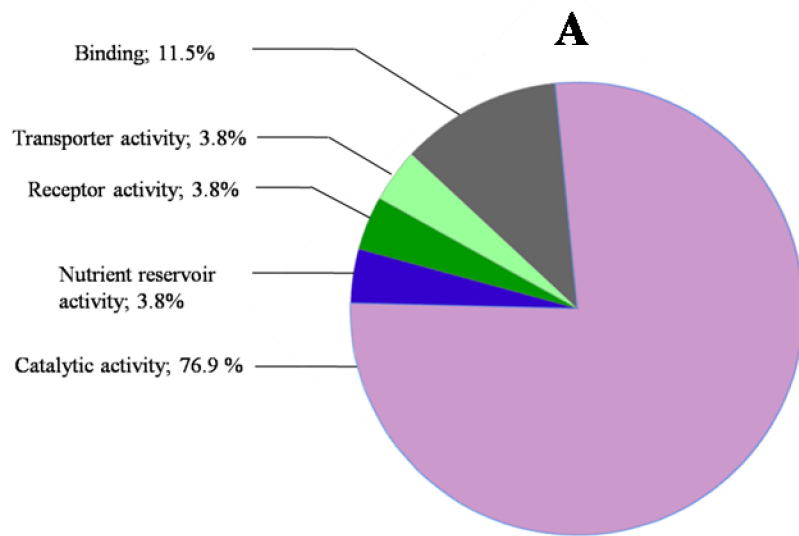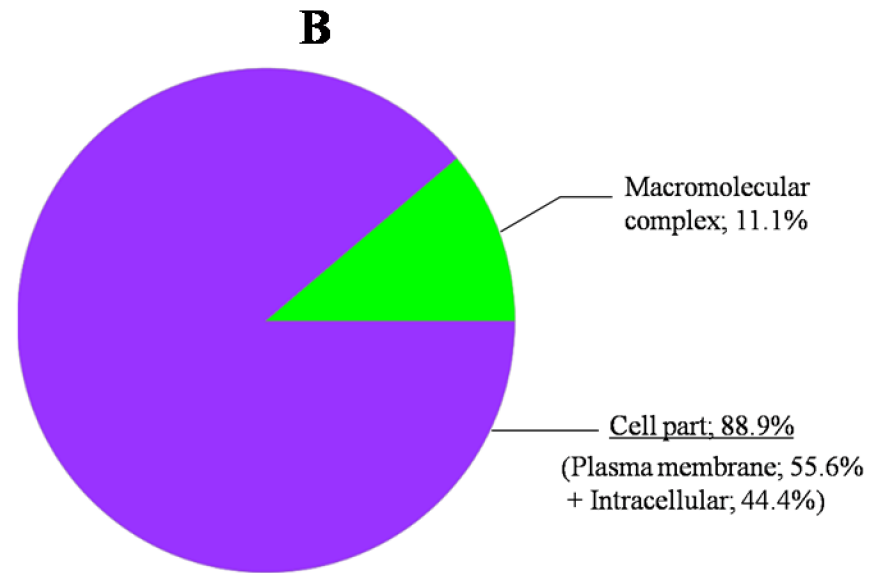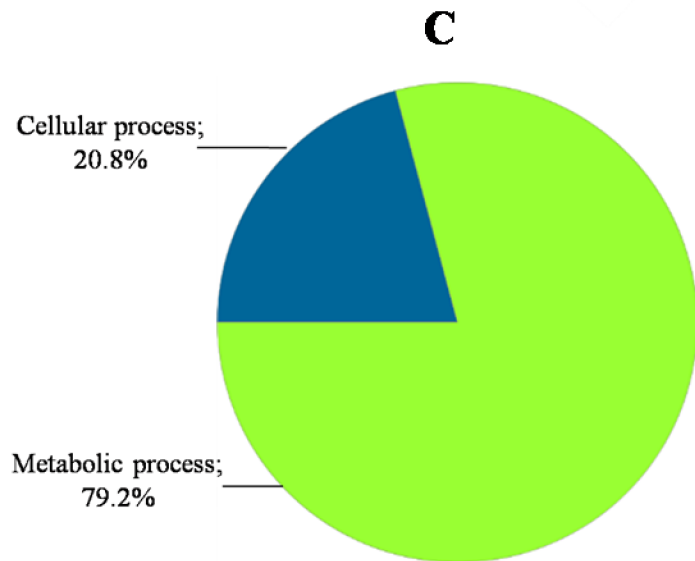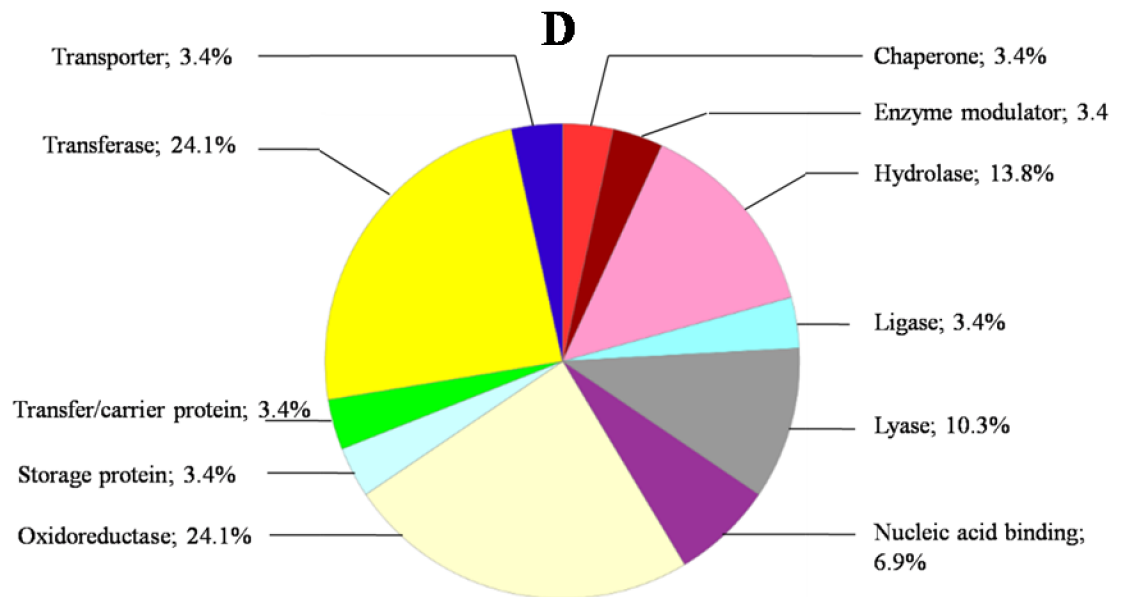

Source: https://www.biorxiv.org/content/10.1101/649152v1.full.pdf
